# Supplementary material
Source: PubMed Central journal article supplement (PMC5086299)
Supplement: NIHMS816754-supplement.pdf [file NIHMS816754-supplement.pdf]

## Behavioral Risk Assessment for Infectious Diseases (BRAID): Phase 1 Questions

---

### Phase 1 Items

---

- 1 How many different people have you had unprotected (no condom) sex with?
- 2 How many of these people did you have sex with at least once a month?
- 3 How many of these people did you have sex with less than once a month but more than just once?
- 4 How many of these people were one-night stands or people you just met?
- 5 How many of these people did you pay with money or drugs to have sex?
- 6 How many of these people paid you with money or drugs to have sex?
- 7 With how many women have you had unprotected sex?
- 8 With how many men have you had unprotected sex?
- 9 How many of the people you had sex with used drugs like crack, cocaine, and heroin on a regular basis (3 times a week or more)?
- 10 How many of the people you had sex with drank alcohol on a regular basis (3 times a week or more)?
  
- 11 How many of the people you had sex with do you know inject drugs?
- 12 How many of the people you had sex with do you know have HIV?
- 13 How many of the people you had sex with do you know have Hepatitis C?
- 14 On how many days did you have unprotected (no condom) anal sex?
- 15 On how many of these days did you have unprotected (no condom) anal sex in your butt?
- 16 On how many days did you have unprotected (no condom) oral sex?
- 17 On how many of these days did you have unprotected (no condom) oral sex where someone put their mouth on your penis or vagina?
- 18 On how many days did you have unprotected (no condom) vaginal sex?
- 19 On how many of these days did you have unprotected (no condom) vaginal sex where something was inserted into your vagina?
- 20 On how many days did you or your partner use Viagra, Levitra, or similar drugs during sex?
- 21 On how many days did you have unprotected sex with a drug dealer (including YOUR drug dealer and any other drug dealer)?
- 22 On how many days has the condom ripped, torn, or fallen off while you were having sex?
- 23 Have you purchased condoms?
- 24 Have you been provided with condoms?
- 25 On how many days did you snort a drug?
- 26 On how many days did you share a straw (or something else you use to snort drugs) with someone else?
- 27 On how many days did you inject a drug?
- 28 Has anyone injected you with a drug?
- 29 Have you helped someone else inject drugs?
- 30 When did you inject a drug for the first time?
- 31 When was the last time you injected a drug?
- 32 When was the last time someone else injected you with a drug?
- 33 When was the last time you helped someone else inject a drug (for example, you injected the drug for them)?
- 34 When was the last time you snorted a drug?
- 35 On how many days did you use crack or cocaine to get high?
- 36 On how many days did you have unprotected sex while you were high on a stimulant like crack or cocaine?
- 37 On how many days did you have sex for much longer than usual (for example, hours more than usual) while high from a stimulant like crack or cocaine?

Behavioral Risk Assessment for Infectious Diseases (BRAID): Phase 1 Questions

- 38 Does being high from crack or cocaine increase, decrease, or have no effect on how long your sex lasts?
- 39 By how many minutes does your sex usually increase or decrease?
- 40 Does your desire for sex increase, decrease, or stay the same after using crack or cocaine?
- 41 Does your enjoyment from sex increase, decrease, or stay the same after using crack or cocaine?
- 42 On how many days did you or your sexual partner have sex for so long after using crack or cocaine that you developed sores, bleeding, blistering, or painful skin irritation in the genitals or anus?
- 43 Does crack or cocaine make it easier, more difficult, or have no effect on your ability to orgasm during sex?
- 44 Have condoms ever ripped, torn, or fallen off when you are having sex on crack or cocaine?
- 45 On how many days did you drink alcohol until you were buzzed or drunk?
- 46 On how many days did you have unprotected sex while you were buzzed or drunk from alcohol?
- 47 Have condoms ever ripped, torn, or fallen off when you are having sex on alcohol?
- 48 Does being buzzed or drunk from alcohol increase, decrease, or have no effect on how long your sex lasts?
- 49 By how many minutes does your sex usually increase or decrease?
- 50 Does your desire for sex increase, decrease, or stay the same after drinking alcohol?
- 51 Does your enjoyment from sex increase, decrease, or stay the same after drinking alcohol?
- 52 On how many days did you or your sexual partner have sex for so long after drinking alcohol that you developed sores, bleeding, blistering, or painful skin irritation in the genitals or anus?
- 53 Does alcohol make it easier, more difficult, or have no effect on your ability to orgasm during sex?
- 54 On how many days did you use an opiate like heroin, Oxycontin, or Vicodin?
- 55 On how many days did you have unprotected sex while under the influence of an opiate like heroin, Oxycontin, or Vicodin?
- 56 Have condoms ever ripped, torn, or fallen off when you are having sex on an opiate like heroin, Oxycontin, or Vicodin?
- 57 How often do you ask your sexual partners if he/she has HIV? Everytime, Sometimes, Rarely, or Never?
- 58 Do you have any condoms with you or at home right now?
- 59 If you inject drugs, do you have any clean needles with you or at home right now?
- 60 Do you know a lot about how HIV is transmitted?
- 61 Do you know a lot about how Hepatitis C is transmitted?
- 62 Are you at great risk for getting HIV?
- 63 Are you at great risk for getting Hepatitis C?
- 64 How many of your friends and family have HIV? None, A Few, Some, or Most?
- 65 How many of your friends and family have Hepatitis C? None, A Few, Some, or Most?
